# Supplementary material for: Randomized adaptive assessment of post COVID syndrome treatments (RAPID): a study protocol for a multicenter, randomized, controlled adaptive platform trial of treatment options for Post Covid Syndrome (PCS) on patients physical function including the first intervention specific appendix RAPID_REVIVE (reducing inflammatory activity in patients with PCS)
Source: Springer Nature journal article supplement (doi:10.1186/s13063-025-09008-0), 2025-08-19
Supplement: MOESM1 [file 13063_2025_9008_MOESM1_ESM.pdf › 13063_2025_9008_MOESM1_ESM.pdf]

1 **Patienteninformation und Einwilligungserklärung zu einer klinischen Prüfung**  
2 **(Studie) mit optionalem MRT**

4 **Prüfzentrum:**

5 xy

6 **Hauptprüfer oder einziger Prüfer:** XXX

7 EU trial number: 2024-511628-16-00

8 Name und Anschrift des Sponsors: Goethe-Universität Frankfurt, vertreten durch den  
9 Präsidenten, dieser vertreten durch [REDACTED]

10

11 Universitätsklinikum Frankfurt

12 Theodor-Stern-Kai 7

13 60590 Frankfurt

14 Tel.: [REDACTED]

15 E-Mail: [REDACTED]

16

17 **Randomisierte Studie zur Untersuchung von Behandlungsoptionen des Post-**  
18 **COVID Syndroms**

19 Randomized adaptive assessment of post COVID syndrome treatments\_Reducing Inflammatory  
20 Activity in Patients with post COVID Syndrome

21 Prüfplancode: RAPID\_REVIVE

22

23 Sehr geehrte Patientin, sehr geehrter Patient,

24 wir möchten Sie fragen, ob Sie bereit sind, an der nachfolgend beschriebenen klinischen  
25 Prüfung (Studie) teilzunehmen.

26 Klinische Prüfungen sind notwendig, um Erkenntnisse über die Wirksamkeit und Verträglichkeit  
27 von Arzneimitteln zu gewinnen oder zu erweitern. Deshalb schreibt der Gesetzgeber im  
28 Arzneimittelgesetz vor, dass neue Arzneimittel klinisch geprüft werden müssen. Die klinische  
29 Prüfung, die wir Ihnen hier vorstellen, wurde – wie es das Gesetz verlangt – von der  
30 zuständigen nationalen Behörde unter Einbeziehung der national zuständigen Ethikkommission  
31 genehmigt.

32 Diese klinische Prüfung wird an mehreren Orten durchgeführt; es sollen insgesamt 376  
33 Personen daran teilnehmen. An unserem Zentrum sollen ungefähr 40 Personen an der

34 klinischen Prüfung teilnehmen. Die Studie wird durch den oben genannten Sponsor veranlasst  
35 und finanziert.

36 **Ihre Teilnahme an dieser klinischen Prüfung ist freiwillig.** Sie werden in diese Prüfung also nur  
37 dann einbezogen, wenn Sie dazu schriftlich Ihre Einwilligung erklären. Sofern Sie nicht an der  
38 klinischen Prüfung teilnehmen oder später aus ihr ausscheiden möchten, erwachsen Ihnen  
39 daraus keine Nachteile.

40 Der nachfolgende Text soll Ihnen die Ziele und den Ablauf erläutern. Der Text ist in drei Teile  
41 gegliedert:

- 42 - Kurzdarstellung der Studie.
- 43 - Teil I: Informationen zum Ablauf der klinischen Prüfung einschließlich der damit  
44 zusammenhängenden gesundheitlichen Gesichtspunkte.
- 45 - Teil II: spezifische Informationen zum Datenschutz und zu den Bioproben (Blut, Stuhl etc.).

46 Auf jeden Fall wird eine Prüferärztin oder ein Prüferarzt ein Aufklärungsgespräch mit Ihnen führen.  
47 Bitte zögern Sie nicht, alle Punkte anzusprechen, die Ihnen unklar sind. Sie können gerne Sätze  
48 und Abschnitte markieren, die Sie nicht verstanden haben, um sie mit dem aufklärenden Arzt  
49 zu besprechen. Sie werden danach ausreichend Bedenkzeit erhalten, um über die Teilnahme zu  
50 entscheiden.

## Kurzdarstellung der Studie

**Grund für die Studie:** Menschen mit einem Post COVID Syndrom haben über Monate hinweg Beschwerden. Diese Beschwerden können sehr unterschiedlich sein, und die Ursachen sind noch nicht vollständig verstanden.

In dieser Studie wollen wir ein neues Medikament, IMU-838, mit dem Wirkstoff Vidofludimus Calcium (VidoCa) untersuchen.

**Das getestete Prüfpräparat:** Das Prüfpräparat IMU-838 wurde bisher nicht zugelassen und ist noch in der klinischen Prüfung.

Es wird seit einigen Jahren für die Behandlung von Multipler Sklerose, einer entzündlichen Hirnerkrankung, in klinischen Studien geprüft. Neuere Studienergebnisse haben gezeigt, dass IMU-838 auch gegen Viren wirken kann.

Wir möchten prüfen, ob IMU-838 in der Lage ist, den Krankheitsverlauf des Post COVID Syndroms zu verkürzen.

**Studienablauf:** Die Studienteilnahme für Sie dauert insgesamt knapp drei Monate.

Wenn Sie an der Studie teilnehmen, werden Sie zunächst untersucht.

Es gibt dann zwei Möglichkeiten, wie Sie behandelt werden:

1) Sie bekommen entweder über 56 Tage IMU-838 als Tablette oder

2) Sie bekommen 56 Tage ein Placebo als Tablette.

Ein Placebo sieht aus wie IMU-838, enthält aber keinen Wirkstoff. Die Entscheidung, zu welcher Gruppe Sie eingeteilt werden, erfolgt per Zufall (Randomisierung), Ihre Ärztinnen und Ärzte haben hierauf keinen Einfluss und wissen nicht, zu welcher Gruppe Sie zugeordnet werden.

Wir beobachten bis zum 84. Tag Ihren Gesundheitszustand. Sie werden dazu mehrere Fragebögen ausfüllen, Blut- und Stuhlproben werden gewonnen. Sie tragen einige Tage einen Ohrsensor und eine Armbanduhr, die Ihre Herzfrequenz, Atemfrequenz, Sauerstoffsättigung, Temperatur und Bewegung messen. Wenn Sie dazu einwilligen, wird zusätzlich ein MRT (Magnetresonanztomographie) vom Kopf gemacht.

**Möglicher Nutzen:** Aufgrund der bisherigen Forschungsergebnisse erhoffen sich Sponsor und Prüfarzt, dass die Behandlung mit IMU-838 Ihren Krankheitsverlauf verkürzt.

Das ist bisher jedoch nicht nachgewiesen. Es kann deshalb sein, dass diese Behandlung für Sie keinen Nutzen haben wird. Dies ist auch der Fall, wenn Sie in die Placebo-Gruppe eingeteilt werden.

**Risiken und Belastungen:** Die Teilnahme an einer Studie ist mit Risiken und Belastungen verbunden.

- IMU-838 kann Nebenwirkungen haben, die über die Risiken Ihrer Standardtherapie hinausgehen. Insgesamt wurden bisher jedoch keine relevanten Nebenwirkungen festgestellt. Nur bei der Einnahme von hohen Dosen von IMU-838 kam es vereinzelt zu Blut im Urin. Daneben sind leichtere Nebenwirkungen zu erwarten. In seltenen Fällen können aber auch bislang unbekannte andere schwere Nebenwirkungen auftreten.

• Die studienbedingten Untersuchungen sind regelmäßig mit Belastungen und ggf. Beeinträchtigungen verbunden. Darüber hinaus haben sie vor allem folgende Risiken: Im Verlauf der klinischen Prüfung wird Ihnen dreimal Blut abgenommen. Dies kann Schmerzen und sehr selten bleibende Schäden verursachen. Das MRT (Kernspin) des Kopfes kann als unangenehm empfunden werden, da Sie in einer geschlossenen Röhre liegen und die Untersuchung relativ laut ist. Der Ohrsensor oder die Armbanduhr können als störend empfunden werden.

Eine ausführlichere Angabe der Risiken und Belastungen finden Sie im Teil I unter Punkt 5. Der Prüfarzt wird mit Ihnen darüber ausführlich sprechen.

Freiwilligkeit: Es ist Ihre freie Entscheidung, ob Sie an dieser Studie teilnehmen möchten oder nicht. Sie können jederzeit NEIN sagen, sofort oder auch später. Sie brauchen dafür keine Gründe anzugeben und haben keine Nachteile in Ihrer weiteren medizinischen Versorgung.

Zusätzlich zur schriftlichen Information werden Sie mündlich aufgeklärt. Fragen Sie den Prüfarzt, wenn Sie etwas nicht verstehen. Sie haben anschließend ausreichend Bedenkzeit, um sich für oder gegen eine Teilnahme zu entscheiden. Wenn Sie sich für die Teilnahme entscheiden, unterschreiben Sie bitte die Einwilligungserklärung.

## 106 Inhaltsverzeichnis

|     |                                                                                               |    |
|-----|-----------------------------------------------------------------------------------------------|----|
| 107 |                                                                                               |    |
| 108 | Teil I: Informationen zum Ablauf der klinischen Prüfung und zu gesundheitlichen Aspekten..... | 6  |
| 109 | I. 1.    Warum und mit welchem Prüfpräparat wird diese Prüfung durchgeführt?                  | 6  |
| 110 | I. 2.    Erhalte ich das Prüfpräparat auf jeden Fall?                                         | 6  |
| 111 | I. 3.    Wie ist der Ablauf der Studie und was ist bei der Teilnahme zu beachten?             | 7  |
| 112 | I. 4.    Welchen persönlichen Nutzen habe ich von der Teilnahme an der Studie?                | 9  |
| 113 | I. 5.    Welche gesundheitlichen Risiken und Belastungen sind mit der Teilnahme an der        |    |
| 114 | Studie verbunden?                                                                             | 10 |
| 115 | a)    Risiken durch das Prüfmedikament IMU-838                                                | 10 |
| 116 | b)    Risiken durch studienbedingte Maßnahmen                                                 | 11 |
| 117 | I. 6.    Welche anderen Behandlungsmöglichkeiten gibt es außerhalb der Studie?                | 12 |
| 118 | I. 7.    Wer darf an dieser klinischen Prüfung nicht teilnehmen?                              | 12 |
| 119 | I. 8.    Entstehen für mich Kosten durch die Teilnahme an der klinischen Prüfung? Erhalte     |    |
| 120 | ich eine Aufwandsentschädigung?                                                               | 13 |
| 121 | I. 9.    Bin ich während der klinischen Prüfung versichert?                                   | 13 |
| 122 | I. 10.   Werden mir neue Erkenntnisse zu der klinischen Prüfung mitgeteilt?                   | 15 |
| 123 | I. 11.   Wer entscheidet, ob ich aus der klinischen Prüfung ausscheide?                       | 15 |
| 124 | I. 12.   An wen wende ich mich bei weiteren Fragen?                                           | 15 |
| 125 | Teil II: Informationen zum Datenschutz und zu den Bioproben .....                             | 17 |
| 126 | II. 1.   Was geschieht mit den über mich erhobenen Daten?                                     | 17 |
| 127 | a)    Allgemeine Informationen                                                                | 17 |
| 128 | b)    Rechtsgrundlage                                                                         | 17 |
| 129 | c)    Verantwortlichkeit                                                                      | 17 |
| 130 | d)    Zweck(e)                                                                                | 18 |
| 131 | e)    Weitergabe/Empfänger                                                                    | 18 |
| 132 | f)    Ihre Rechte                                                                             | 20 |
| 133 | g)    Dauer der Speicherung der Daten:                                                        | 24 |
| 134 | h)    Veröffentlichung                                                                        | 24 |
| 135 | II. 2.   Was geschieht mit meinen Bioproben?                                                  | 24 |
| 136 | a)    Verwendung Ihrer Bioproben                                                              | 25 |
| 137 | b)    Lagerung                                                                                | 25 |
| 138 | c)    Weitergabe/Empfänger                                                                    | 25 |
| 139 | d)    Umgang mit den Bioproben bei Widerruf/vorzeitiger Beendigung der Teilnahme              | 25 |
| 140 | Anlagen .....                                                                                 | 31 |
| 141 |                                                                                               |    |
| 142 |                                                                                               |    |
| 143 |                                                                                               |    |

144

145 Teil I: Informationen zum Ablauf der klinischen Prüfung und zu gesundheitlichen  
146 Aspekten

147 I. 1. Warum und mit welchem Prüfpräparat wird diese Prüfung durchgeführt?

148 Menschen mit einem Post COVID Syndrom haben über viele Monate hinweg Beschwerden.  
149 Diese Beschwerden können sehr verschieden sein, und man weiß noch nicht genau, warum sie  
150 entstehen. Es könnte sein, dass das Corona-Virus auch nach der ersten Krankheitsphase im  
151 Körper bleibt. Eine andere Möglichkeit ist, dass die Corona-Infektion das Immunsystem so  
152 schwächt, dass Viren, die schon vorher im Körper waren, wieder aktiv werden. In beiden Fällen  
153 könnte eine Behandlung mit Medikamenten, die Viren bekämpfen, helfen. Bisher wurde noch  
154 nicht untersucht, ob solche Medikamente bei der Behandlung des Post COVID Syndroms helfen  
155 können. Eine dritte Möglichkeit ist eine nicht aufhörende Überreaktion des Immunsystems auf  
156 die Corona-Infektion. Daher könnten auch Medikamente, die das Immunsystem in seiner  
157 Aktivität hemmen, hilfreich sein.

158 Es ist allerdings gezeigt worden, dass das antivirale Medikament IMU-838 die Dauer der akuten  
159 Corona-Infektion verkürzt und gleichzeitig die Aktivität des Immunsystems hemmt. Daher  
160 könnte IMU-838 auch gegen das Post COVID Syndrom wirken. Ob dies der Fall ist, soll in dieser  
161 Studie untersucht werden. Bei IMU-838 handelt es sich um eine Tablette, die den Wirkstoff  
162 Vidofludimus-Calcium (VidoCa) enthält.

163 I. 2. Erhalte ich das Prüfpräparat auf jeden Fall?

164 IMU-838 ist ein Arzneimittel in klinischer Erprobung. Das heißt, es ist für die Behandlung des  
165 Post COVID Syndroms noch nicht zugelassen. Es wurde bisher bei ungefähr 1400 Personen,  
166 davon 200 mit akuter Corona-Infektion geprüft. Bei Patienten mit einem Post COVID Syndrom  
167 wurde es noch nicht getestet.

168 Nicht alle Teilnehmer erhalten das Prüfpräparat IMU-838. Im Rahmen dieser klinischen Prüfung  
169 wird IMU-838 mit einem Placebo verglichen. Ein Placebo ist eine Tablette, die genauso aussieht  
170 wie das Prüfpräparat, aber keinen Wirkstoff enthält. Der Vergleich mit dem Placebo dient dazu,  
171 die Wirkungen und Nebenwirkungen von IMU-838 besser beurteilen zu können.

172 Ob Sie ein Placebo oder das Prüfpräparat IMU-838 erhalten, entscheidet ein Zufallsverfahren.  
173 Dieses Verfahren nennt man Randomisierung. Es ist vergleichbar mit dem Werfen einer Münze.  
174 Die Wahrscheinlichkeit, Placebo oder IMU-838 zu bekommen, ist jeweils gleich groß. Sie beträgt  
175 also jeweils 50%.

176 Um objektive Studiendaten zu erhalten, ist es notwendig, dass weder Sie noch Ihr Prüfarzt  
177 wissen, ob Sie das Prüfpräparat oder das Placebo einnehmen. Dieses Vorgehen nennt man

178 „doppelblind“. Sollte es aus Sicherheitsgründen notwendig sein, kann sofort festgestellt  
179 werden, welche Behandlung Sie im Rahmen der Studie erhalten haben.

180 Wenn Sie an der Studie teilnehmen, werden Sie die Studientabletten über einen Zeitraum von  
181 56 Tagen einnehmen.

182 I. 3. Wie ist der Ablauf der Studie und was ist bei der Teilnahme zu beachten?

183 Bei der geplanten Studie handelt es sich um eine sogenannte "Plattformstudie". Wir möchten  
184 kurz erklären, was das bedeutet.

185 Bei Plattformstudien wird einerseits geprüft, ob ein bestimmtes Medikament wirkt.  
186 Andererseits eröffnen sie die Möglichkeit, diese Wirkung im Verlauf der Studie mit der Wirkung  
187 anderer Medikamente oder nicht-medikamentöser Behandlungen zu vergleichen. Das  
188 bedeutet, dass während der Studie verschiedene Behandlungen erprobt und manchmal auch  
189 abgebrochen werden können. Der genaue Verlauf der Studie steht also nicht von Anfang an  
190 fest.

191 Wir werden in regelmäßigen Abständen überprüfen, ob IMU-838 gut wirkt oder ob andere  
192 Behandlungen erfolgversprechend sind. Das kann dazu führen, dass wir den Studienplan  
193 ändern. In diesem Fall werden wir Sie informieren und fragen, ob Sie weiterhin an der Studie  
194 teilnehmen möchten.

195 **Wenn Sie sich jetzt für eine Teilnahme entscheiden, sieht der Ablauf wie folgt aus:**

196 Für die Teilnahme an der Studie sollten Sie ein Smartphone oder Tablett besitzen und bedienen  
197 können. In Einzelfällen können wir aber auch ein solches Gerät zur Verfügung stellen. Bei  
198 Aufnahme in diese klinische Prüfung werden Sie zu Ihren Vorerkrankungen und Ihrem aktuellen  
199 Gesundheitsstatus befragt und Sie werden vom Arzt untersucht. Außerdem absolvieren Sie  
200 zwei kurze Tests, um Ihre körperliche und geistige Leistungsfähigkeit festzustellen und füllen  
201 zwei kurze Fragebögen aus. Zudem benötigen wir von Ihnen ca. 20 ml Blut für  
202 Laboruntersuchungen. Wenn entsprechende Laboruntersuchungen bereits aus der klinischen  
203 Versorgung vorliegen, können wir auf Teile dieser Untersuchungen verzichten und die  
204 vorliegenden Daten verwenden.

205 Die Möglichkeit einer weiteren Teilnahme an dieser klinischen Prüfung wird von den  
206 Ergebnissen dieser Voruntersuchung abhängen.

207 Nach der Aufnahme in die klinische Prüfung wird diese für jeden Teilnehmer voraussichtlich  
208 drei Monate dauern. Sie erhalten von uns zusätzlich zu dieser Information einen Terminplan zur  
209 Orientierung (Anlage 1).

210 **Tag -7**

211 Sie kommen zur Untersuchung ins Prüfzentrum. Die Untersuchung an diesem Tag wird etwa 6  
212 Stunden dauern. Wir führen mit Ihnen einen Test durch, um Ihre körperliche und geistige  
213 Leistungsfähigkeit festzustellen. Außerdem benötigen wir von Ihnen eine Stuhlprobe und  
214 nehmen Ihnen etwa 50 ml Blut ab. Darüber hinaus werden wir Sie bitten, 8 Fragebögen



215 auszufüllen. Dafür wird auf Ihrem Handy eine App installiert und Ihnen gezeigt, wie diese  
216 benutzt wird. Eine schriftliche Gebrauchsanweisung finden Sie in Anlage 2.

217 Bevor Sie mit der Einnahme der Tabletten beginnen, werden Sie 7 Tage lang einen Ohrsensor  
218 und eine Armbanduhr (Smartwatch) tragen. Diese messen Ihre Körpertemperatur,  
219 Herzfrequenz, Atemfrequenz, den Sauerstoffgehalt Ihres Blutes und wie viel Sie sich bewegen.  
220 Daraus können wir ableiten, wie gut Ihr Herz-Kreislauf-System funktioniert und wie aktiv Sie  
221 sind. Wir weisen Sie in die Handhabung des Ohrsensors und der Armbanduhr ein. Eine  
222 schriftliche Gebrauchsanweisung finden Sie in Anlage 2.

223 Bei den ersten 100 Teilnehmern wird, wenn diese an dieser Untersuchung Interesse haben,  
224 innerhalb dieser 7 Tage auch eine Kernspintomographie des Kopfes durchgeführt. Zusätzliche  
225 Informationen hierzu finden Sie weiter unten.

226

227 **Tag 1** (erster Tag der Tabletteneinnahme)

228 Nachdem Sie 7 Tage den Ohrsensor und die Armbanduhr getragen haben, kommen Sie erneut  
229 ins Prüfzentrum. Dort erhalten Sie die Tabletten (IMU-838 oder Placebo) für die ersten 28 Tage.  
230 Sie erhalten zwei verschiedene Flaschen. In der kleineren befinden sich die Tabletten für die  
231 ersten 7 Tage. Diese haben eine niedrigere Dosierung von 22,5 mg VidoCa (oder Placebo); zum  
232 Einschleichen der Medikation. Wenn die kleinere Flasche nach 7 Tagen aufgebraucht ist,  
233 beginnen Sie mit den Tabletten aus der größeren Flasche. In dieser Flasche befinden sich 30  
234 Tabletten mit 45 mg VidoCa (oder Placebo).

235 **Tag 14**

236 Wir erkundigen uns bei Ihnen erneut per Videotelefonat oder telefonisch nach Ihrem Befinden.

237 **Tag 21**

238 An diesem Tag starten Sie zu Hause die Messung mit dem Ohrsensor und der Armbanduhr und  
239 führen diese wieder über 7 Tage durch.

240 **Tag 28**

241 Sie kommen an diesem Tag zu uns in das Prüfzentrum. Die Untersuchung an diesem Tag dauert  
242 etwa 2 Stunden.

243 Wir benötigen erneut eine Stuhlprobe und nehmen Ihnen etwa 60 ml Blut ab. Wir führen  
244 erneut mit Ihnen drei kurze Tests durch, um Ihre körperliche und geistige Leistungsfähigkeit  
245 festzustellen. Außerdem werden Sie 8 Fragebögen über Ihre App beantworten. Sie erhalten die  
246 Tabletten für die nächsten 28 Tage von uns.

247 **Tag 49**

248 An diesem Tag starten Sie erneut zu Hause die Messung mit dem Ohrsensor und der  
249 Armbanduhr und führen diese wieder über 7 Tage durch. Die Geräte bringen Sie an Tag 56 mit  
250 in das Prüfzentrum.



251 **Tag 56** (letzter Tag der Tabletteneinnahme)

252 Nach Einnahme der letzten Tablette kommen Sie zu uns in das Prüfbzentrum. Die Untersuchung  
253 an diesem Tag dauert etwa 2 Stunden.

254 Wir werden die gleichen Untersuchungen wie an Tag 28 durchführen (Stuhlprobe, etwa 60 ml  
255 Blut, 8 Fragebögen per App, körperliche und geistige Leistungstests). Zusätzlich übergeben Sie  
256 uns den Ohrsensor und die Armbanduhr.

257 **Tag 84**

258 Wir erkundigen uns bei Ihnen telefonisch oder per Videotelefonat nach Ihrem Befinden.

259 Zu diesem Zeitpunkt füllen Sie bitte ein letztes Mal die 8 Fragebögen per App aus.

260 **Einnahme der Tabletten – was ist zu beachten?**

261 Sie müssen die Studenttabletten ab dem 1. Tag über einen Zeitraum von 56 Tagen einnehmen.  
262 Schlucken Sie jeweils 1 Tablette täglich unzerkaut etwa eine halbe Stunde vor dem Frühstück  
263 mit einem großen Glas Wasser. Insgesamt sollten Sie während der Studienteilnahme  
264 ausreichend Flüssigkeit zu sich nehmen, in jedem Fall mindestens 1,5 Liter am Tag.

265 Bewahren Sie die Tabletten an einem sicheren, dunklen und trockenen Ort bei  
266 Zimmertemperatur auf. Sorgen Sie dafür, dass sie für Kinder oder andere Personen nicht  
267 erreichbar sind. Die Weitergabe der Studenttabletten an Dritte ist untersagt.

268 Zusätzliche Medikamente (auch rezeptfreie), von denen der Prüfarzt noch nichts weiß, dürfen  
269 Sie – außer bei Notfällen – nur nach Rücksprache mit Ihrem Prüfarzt einnehmen. Wenn Sie von  
270 anderen Ärzten behandelt werden, müssen Sie diese über Ihre Teilnahme an der klinischen  
271 Prüfung informieren. Auch Ihr Prüfarzt muss über jede medizinische Behandlung, die Sie durch  
272 einen anderen Arzt während der klinischen Prüfung erhalten, informiert werden. Sie erhalten  
273 einen Studenausweis, den Sie auch für den Notfall immer mit sich führen sollten.

274 Bitte beachten Sie, dass IMU-838 die Wirkung anderer Medikamente abschwächen oder  
275 verstärken kann. Nehmen Sie daher insbesondere keine Schmerztabletten wie Ibuprofen,  
276 Diclofenac oder Mittel gegen Übelkeit, ohne mit Ihrem Arzt zu sprechen.

277 Zu den Untersuchungen im Prüfbzentrum sollten Sie die Packung Ihrer Studienmedikation  
278 mitbringen, egal ob sie leer ist oder nicht.

279 **I. 4. Welchen persönlichen Nutzen habe ich von der Teilnahme an der Studie?**

280 Die Teilnahme an dieser Studie kann möglicherweise Ihre Beschwerden lindern oder verkürzen.  
281 Für das Prüfpräparat IMU-838 gibt es jedoch noch keinen Nachweis für seine Wirksamkeit bei  
282 der Therapie des Post COVID Syndroms. Es ist daher möglich, dass Sie von der Teilnahme an  
283 dieser klinischen Prüfung keinen Nutzen haben. Die Ergebnisse der Studie können aber dazu  
284 beitragen, die Behandlung des Post COVID Syndroms zukünftig zu verbessern.

I. 5. Welche gesundheitlichen Risiken und Belastungen sind mit der Teilnahme an der Studie verbunden?

Bitte teilen Sie den Mitarbeitern der Prüfstelle **alle** Beschwerden, Erkrankungen oder Verletzungen mit, die im Verlauf der klinischen Prüfung auftreten. Falls Sie diese als schwerwiegend empfinden, teilen Sie den Mitarbeitern der Prüfstelle diese bitte umgehend mit, gegebenenfalls telefonisch. Die Kontaktdaten finden Sie vorne auf dieser Information.

**a) Risiken durch das Prüfmedikament IMU-838**

Bisher wurden bei 1400 Patienten in verschiedenen Studien keine schwerwiegenden Nebenwirkungen festgestellt. Die häufigsten Nebenwirkungen waren Kopfschmerz (10%) und Erkältungssymptome (1-4%). Wurde IMU-838 in der Dosis gegeben, wie es in dieser Studie der Fall ist, dann hatten die Teilnehmer mit IMU-838 ähnlich häufig diese Nebenwirkungen, wie die Teilnehmer, die das Scheinmedikament (Placebo) genommen haben.

Bei der Einnahme von hohen Dosen von IMU-838 – höher als Sie sie für diese Studie einnehmen werden – wurde vereinzelt Blut im Urin gefunden. Sollten Sie Auffälligkeiten beim Wasserlassen bemerken oder neue Schmerzen in der Flankenregion, teilen Sie dies Ihrem Prüfarzt bitte umgehend mit. Er wird das weitere Vorgehen mit Ihnen besprechen. Es ist aber sehr unwahrscheinlich, dass dies eintreten wird.

Wie bei jedem neuen Medikament kann es auch mit IMU-838 Nebenwirkungen geben, die noch nicht bekannt sind. Viele Nebenwirkungen verschwinden, wenn das Studienmedikament abgesetzt wird, aber in einigen Fällen können die Nebenwirkungen schwerwiegend und/oder dauerhaft sein.

Jedes Medikament kann eine allergische Reaktion auslösen. Informieren Sie sofort Ihren Studienarzt, wenn Sie eines der folgenden Symptome bemerken:

- Plötzliches Anschwellen der Lippen, des Gesichts, des Rachens oder der Zunge,
- schwerer Hautausschlag,
- Schluck- oder Atembeschwerden.

Informieren Sie sofort Ihren Prüfarzt, wenn Sie eine allergische Reaktion vermuten.

Klinische Studien mit anderen Arzneimitteln, die einen ähnlichen Wirkmechanismus wie IMU-838 haben, zeigen, dass diese Medikamente die Wirksamkeit von Impfungen nicht beeinträchtigen. Es liegen jedoch keine klinischen Daten über IMU-838 vor. Da Impfungen die Symptome des Post COVID Syndroms beeinflussen können und daher die Auswertbarkeit der Studie beeinflussen können, sollten Sie während des Studienzeitraums keine Impfung erhalten, wenn es sich vermeiden lässt.

Bitte sprechen Sie mit Ihrem Studienarzt, wenn Sie sich trotzdem impfen lassen möchten. Ihr Studienarzt wird Sie über die potenziellen Risiken und Vorteile einer solchen Impfung und Ihrer Teilnahme an dieser Forschungsstudie beraten können.

321 Weitere Informationen können Sie der angehängten Beschreibung (Anlage 3) aller bisher  
322 aufgetretener Nebenwirkungen entnehmen.

323 **b) Risiken durch studienbedingte Maßnahmen**

324 Blutabnahmen

325 Im Rahmen der Studie werden wir Ihnen einmal etwa 20 ml, einmal etwa 50 ml und zweimal  
326 etwa 60 ml Blut abnehmen. 20 ml Blut entsprechen etwa einem Esslöffel. In der Regel ist das  
327 Risiko einer Blutentnahme sehr gering. Sie ist jedoch manchmal unangenehm und mit  
328 Schmerzen verbunden. Sehr selten kann es zu einer Verletzung und dauerhaften Schädigung  
329 eines Nervs oder zu einem größeren Bluterguss an der Einstichstelle kommen.

330

331 Magnetresonanztomographie (MRT) des Kopfes

332 Mit Hilfe von Magnetfeldern werden bei einer MRT-Untersuchung genaue Bilder des Gehirns  
333 erzeugt. Sie werden dazu in eine Art Röhre gelegt. Manche Patienten können dadurch während  
334 der Untersuchung Unbehagen verspüren, insbesondere, wenn sie unter Platzangst leiden. In  
335 solchen Fällen kann es hilfreich sein, vor der Untersuchung beruhigende Maßnahmen zu  
336 ergreifen. Außerdem ist die Untersuchung relativ laut. Sie tragen daher Ohrschützer.

337

338 Zufallsbefunde beim MRT des Kopfes

339 Es können sich Auswertungsergebnisse ergeben, die möglicherweise für Ihre Gesundheit  
340 wichtig sind (Zufallsbefunde). Diese Zufallsbefunde können im Einzelfall für Ihre Gesundheit von  
341 so erheblicher Bedeutung sein, dass ein Arzt eine Kontaktaufnahme als dringend notwendig  
342 erachtet. Das ist insbesondere der Fall, wenn sich daraus ein dringender Verdacht auf eine  
343 schwerwiegende, bisher möglicherweise nicht erkannte Krankheit ergibt, die behandelt werden  
344 könnte.

345 In diesem Fall werden wir einen Facharzt hinzuziehen und Ihre Untersuchungsergebnisse mit  
346 ihm besprechen. Wir werden Sie danach anschreiben und gemeinsam mit dem Facharzt ein  
347 Gespräch mit Ihnen führen, um das weitere Vorgehen zu besprechen.

348 Beachten Sie bitte, dass Sie Gesundheitsinformationen, die Sie durch eine solche Rückmeldung  
349 erhalten, unter Umständen bei anderen Stellen (z.B. vor Abschluss einer Kranken- oder  
350 Lebensversicherung) angeben müssen. Dadurch könnten Sie Nachteile erleiden. Im Zweifel  
351 verzichten Sie auf die MRT-Untersuchung. Eine Studienteilnahme ist dennoch möglich.

352 Ohrsensor

353 Wenn Sie an dieser Studie teilnehmen, tragen Sie 3-mal für jeweils 7 Tage einen Ohrsensor. Der  
354 Ohrsensor wird wie ein Hörgerät im rechten oder linken Ohr getragen. Das Tragen kann als  
355 unangenehm empfunden werden, da der Sensor unter Umständen drücken kann. Wir  
356 versuchen, eine möglichst passende Größe für Ihr Ohr zu finden. Ganz selten kann der Sensor  
357 eine allergische Reaktion hervorrufen; wenn Sie dies vermuten, kontaktieren Sie uns bitte.

358 Armbanduhr / Smartwatch

359 Wenn Sie an dieser Studie teilnehmen, tragen Sie 3-mal für jeweils 7 Tage eine Uhr  
360 (Smartwatch). Die Uhr kann am rechten oder linken Handgelenk getragen werden. Das Display  
361 und der Messsensor geben etwas Licht ab, was von einigen Menschen nachts als störend  
362 empfunden werden kann. Ganz selten kann das Armband eine allergische Reaktion  
363 hervorrufen; wenn Sie dies vermuten, kontaktieren Sie uns bitte.

364

365 Fragebögen

366 Die in dieser Studie verwendeten Fragebögen können unangenehme Gefühle auslösen. Aus  
367 wissenschaftlicher Sicht ist es wünschenswert, von allen Studienteilnehmern vollständig  
368 ausgefüllte Fragebögen zu erhalten. Sie sind jedoch nicht verpflichtet, Fragen zu beantworten,  
369 die Ihnen unangenehm sind.

370 I. 6. Welche anderen Behandlungsmöglichkeiten gibt es außerhalb der Studie?

371 Bisher gibt es keine Therapien, die die Ursache des Post COVID Syndroms gezielt behandeln.  
372 Vielmehr wird versucht, die individuell vorliegenden Symptome mit bereits zugelassenen  
373 Medikamenten zu lindern. Diese Behandlung ist zurzeit die Standardbehandlung für Ihre  
374 Erkrankung. Im Vergleich zur Studienteilnahme kann diese sog. symptomatische Therapie die  
375 Ursachen Ihrer Erkrankung nicht gezielt behandeln. Es ist also nicht damit zu rechnen, dass  
376 nach Absetzen einer symptomatischen Therapie eine längerfristige Besserung eintritt.  
377 Über weitere Einzelheiten kann Sie der Prüfarzt informieren.

378 I. 7. Wer darf an dieser klinischen Prüfung nicht teilnehmen?

379 An dieser klinischen Prüfung dürfen Sie nicht teilnehmen, wenn Sie gleichzeitig an einer  
380 anderen Arzneimittelstudie teilnehmen oder in den vergangenen 6 Monaten teilgenommen  
381 haben.

382 Es ist bislang nicht geklärt, ob es zu einer Schädigung des Ungeborenen kommt, wenn das  
383 Prüfpräparat IMU-838 während der Schwangerschaft eingenommen wird. Studien an Ratten  
384 mit sehr hohen Dosen des Prüfpräparats ergaben jedoch unerwünschte Wirkungen bei den  
385 ungeborenen Tieren. Daher dürfen **schwangere** oder **stillende Frauen nicht** an dieser Studie  
386 teilnehmen. Zu Beginn der klinischen Prüfung müssen sich deshalb alle Frauen einem  
387 Schwangerschaftstest unterziehen. Davon ausgenommen sind Frauen, die nicht mehr  
388 schwanger werden können.

389 Wenn Sie aktuell planen, schwanger zu werden oder Eizellen zu spenden, dürfen Sie einer  
390 Teilnahme nicht zustimmen. Für männliche Teilnehmer gilt: sollten Sie planen, während des  
391 Zeitraums dieser Studie ein Kind zu zeugen oder Sperma zu spenden, dürfen Sie der Teilnahme  
392 nicht zustimmen.

**Maßnahmen zur Schwangerschaftsverhütung:**

Im Falle einer Teilnahme an dieser klinischen Prüfung müssen Sie eine Schwangerschaft zuverlässig verhüten. Sie müssen entweder mindestens eine hochwirksame Verhütungsmethode anwenden (z. B. eine Spirale oder ein Implantat) oder Sie müssen zwei wirksame Verhütungsmethoden, die auf unterschiedliche Weise funktionieren, korrekt anwenden (z. B. eine hormonelle Verhütungspille in Kombination mit einem Kondom). Dies gilt ab einem Monat vor Beginn der Teilnahme, während der Studie sowie bis 30 Tage nach der letzten Dosis des Studienmedikaments (Tag 86).

Wenn Sie während dieser Studie schwanger werden, müssen Sie dies sofort dem Prüfarzt mitteilen. Sie müssen das Studienmedikament sofort absetzen und der Studienarzt wird mit Ihnen und Ihrem Partner/Ihrer Partnerin die Möglichkeiten zum Umgang mit der Schwangerschaft besprechen. Sie werden während der ganzen Schwangerschaft und bis 30 Tage nach der Entbindung überwacht und der Prüfarzt wird Sie außerdem bitten, weitere Informationen über den Verlauf Ihrer Schwangerschaft und die Gesundheit Ihres Babys einholen zu dürfen. Bis zur Geburt ist dazu Ihre Einwilligung ausreichend, ab dem Zeitpunkt der Geburt ist die Einwilligung beider Erziehungsberechtigter notwendig. Sie bekommen im Falle einer Schwangerschaft die notwendigen Dokumente ausgehändigt.

**Hinweise für männliche Patienten mit einer Partnerin im gebärfähigen Alter:**

Sie müssen sich verpflichten, ab der Zustimmung zur Teilnahme an der Studie und bis 30 Tage nach der letzten Dosis des Studienmedikaments (Tag 86) kein Kind zu zeugen.

**Hinweise im Falle einer Schwangerschaft:**

Wenn eine Teilnehmerin oder eine Partnerin eines Teilnehmers trotzdem schwanger wird, kann das Studienmedikament unvorhersehbare Risiken für das ungeborene Kind bergen. Wir möchten in dem Fall die Gesundheit des Kindes bis zum Ende der Schwangerschaft überwachen. Dafür wird es dann eine gesonderte Information- und Einwilligungserklärung geben.

I. 8. Entstehen für mich Kosten durch die Teilnahme an der klinischen Prüfung?  
Erhalte ich eine Aufwandsentschädigung?

Für die Teilnehmer an dieser klinischen Prüfung entstehen keine zusätzlichen Kosten.  
Es gibt keine Aufwandsentschädigung für die Teilnahme an dieser klinischen Prüfung.

I. 9. Bin ich während der klinischen Prüfung versichert?

Bei der klinischen Prüfung eines Arzneimittels müssen alle Studienteilnehmer gemäß dem Arzneimittelgesetz versichert sein. Der Umfang des Versicherungsschutzes ergibt sich aus den Versicherungsunterlagen, die Sie ausgehändigt bekommen.

Wenn Sie vermuten, dass durch die Teilnahme an der klinischen Prüfung Ihre Gesundheit geschädigt oder vorher bestehende Leiden verstärkt wurden, müssen Sie dies unverzüglich dem

429 Versicherer

430 **Kontaktdaten des Versicherers:**

431 Chubb European Group SE

432 Direktion für Deutschland

433 Baseler Straße 10

434 60329 Frankfurt am Main

435 Telefon: +49 69 75613 0

436 Fax: +49 69 746193

437 E-Mail: info.de@chubb.com

438 **Versicherungsscheinnummer:**

439 **DELSCA48846**

440 direkt anzeigen, um Ihren Versicherungsschutz nicht zu gefährden. Lassen Sie sich dabei  
441 gegebenenfalls durch Ihren Prüfarzt unterstützen. Sofern Ihr Prüfarzt Sie dabei unterstützt,  
442 erhalten Sie eine Kopie der Meldung. Sofern Sie Ihre Anzeige direkt an den Versicherer richten,  
443 informieren Sie bitte zusätzlich Ihren Prüfarzt.

444 Bei der Aufklärung der Ursache oder des Umfangs eines Schadens müssen Sie mitwirken und  
445 alles unternehmen, um weiteren Schaden abzuwenden.

446 Während der Dauer der klinischen Prüfung dürfen Sie sich einer anderen medizinischen  
447 Behandlung – außer in Notfällen – nur nach vorheriger Rücksprache mit dem Prüfarzt  
448 unterziehen. Von einer erfolgten Notfallbehandlung müssen Sie den Prüfarzt unverzüglich  
449 unterrichten.

450 Sie erhalten ein Exemplar der Versicherungsbestätigung einschließlich der  
451 Versicherungsbedingungen. Wir weisen Sie insbesondere auf Kapitel 1.4 zum Ausschluss von  
452 Versicherungsleistungen und Kapitel 3.1 zum Umfang der Versicherungsleistung hin. Bitte  
453 beachten Sie außerdem die Kapitel 4.3 und 4.4.2 zu den Obliegenheiten/Verpflichtungen (das  
454 sind Pflichten, die Sie im eigenen Interesse beachten müssen, um den Versicherungsschutz zu  
455 erhalten).

456

457 Wir weisen Sie ferner darauf hin, dass für die Teilnehmer auf dem Weg von und zum  
458 Prüfzentrum eine Unfallversicherung besteht. Der Umfang des Versicherungsschutzes ergibt  
459 sich aus den Versicherungsunterlagen, die Sie ausgehändigt bekommen. Sie erhalten ein  
460 Exemplar der Versicherungsbestätigung einschließlich der Versicherungsbedingungen. Im Falle  
461 eines Unfalls auf dem Weg zum oder vom Prüfzentrum wenden Sie sich bitte unverzüglich an  
462 den

463 **Versicherer:**

464 Chubb European Group SE

465 Direktion für Deutschland



466 Baseler Straße 10  
467 60329 Frankfurt am Main  
468 Telefon: +49 69 75613 0  
469 Fax: +49 69 746193  
470 E-Mail: info.de@chubb.com  
471 **Versicherungsscheinnummer:**  
472 **DELSCA48846**

473 **I. 10. Werden mir neue Erkenntnisse zu der klinischen Prüfung mitgeteilt?**

474 Sie werden während der Teilnahme über neue Erkenntnisse in Bezug auf diese klinische  
475 Prüfung informiert, die für Ihre Bereitschaft zur weiteren Teilnahme wesentlich sein können.  
476 Spätestens ein Jahr nach Beendigung der gesamten klinischen Prüfung müssen  
477 zusammenfassende Ergebnisse in der europäischen Datenbank ([www.clinicaltrialsregister.eu](http://www.clinicaltrialsregister.eu)) –  
478 auch in laienverständlicher Form – bereitgestellt werden. Dies kann von Ihnen unter der oben  
479 angegebenen EU trial Nummer eingesehen werden. Sie können sich zur Information über die  
480 Studienergebnisse auch gerne an Ihren Prüfarzt wenden.

481 **I. 11. Wer entscheidet, ob ich aus der klinischen Prüfung ausscheide?**

482 Sie können jederzeit, auch ohne Angabe von Gründen, Ihre Teilnahme beenden, ohne dass  
483 Ihnen dadurch Nachteile in Ihrer medizinischen Versorgung entstehen. Sie können in diesem  
484 Fall diejenige Therapie erhalten, die man Ihnen außerhalb der Studie empfohlen hätte.  
485 Es ist auch möglich, dass der Prüfarzt oder der Sponsor entscheidet, Ihre Teilnahme an der  
486 klinischen Prüfung vorzeitig zu beenden, ohne dass Sie auf die Entscheidung Einfluss haben.  
487 Die Gründe hierfür können z.B. sein:  
488 - Ihre weitere Teilnahme an der klinischen Prüfung ist ärztlich nicht mehr vertretbar;  
489 - es wird die gesamte klinische Prüfung abgebrochen.  
490 Wenn Sie die klinische Prüfung vorzeitig beenden, ist es für Ihre eigene Sicherheit wichtig, dass  
491 eine Abschlussuntersuchung durchgeführt wird.  
492 Der Prüfarzt wird mit Ihnen besprechen, wie und wo die weitere Behandlung stattfindet.

493 **I. 12. An wen wende ich mich bei weiteren Fragen?**

494 **Beratungsgespräche an dem Prüfcentrum:**

495 Sie haben stets die Gelegenheit zu weiteren Beratungsgesprächen mit dem vorne auf der  
496 Information genannten oder einem anderen Prüfarzt.



497     **Kontaktstelle:**

498     Es existiert außerdem eine Kontaktstelle bei der zuständigen Bundesoberbehörde. Teilnehmer  
499     an klinischen Prüfungen, ihre gesetzlichen Vertreter oder Bevollmächtigte können sich an diese  
500     Kontaktstelle wenden:

501     **Bundesinstitut für Arzneimittel und Medizinprodukte**

502     Fachgruppe Klinische Prüfungen

503     Kurt-Georg-Kiesinger-Allee 3

504     53175 Bonn

505     Telefon: 0228 / 207-4318    Fax: 0228 / 207-4355

506     E-Mail: [ct@bfarm.de](mailto:ct@bfarm.de)

507

## 508 Teil II: Informationen zum Datenschutz und zu den Bioproben

### 509 II. 1. Was geschieht mit den über mich erhobenen Daten?

#### 510 a) **Allgemeine Informationen**

511 Während der klinischen Prüfung werden persönliche Informationen (etwa Alter, Geschlecht,  
512 etc.) und medizinische Befunde (Gesundheitsdaten) von Ihnen erhoben und im Prüfbüro in  
513 Ihrer persönlichen Akte niedergeschrieben oder elektronisch gespeichert. Eine unabhängige  
514 Treuhandstelle (Unabhängige Treuhandstelle der Universitätsmedizin Greifswald, Ellernholzstr.  
515 1-2, 17475 Greifswald; <https://www.ths-greifswald.de/kontakt/>) speichert Ihre  
516 identifizierenden Daten und einen Scan Ihrer Einwilligungserklärung. Die Treuhandstelle sendet  
517 einen Pseudonymisierungscode an die datenhaltenden Stellen. Diese speichern und verarbeiten  
518 Daten nur in pseudonymisierter Form.

519 Pseudonymisiert bedeutet, dass keine Angaben, mit denen Sie direkt identifiziert werden  
520 können (z.B. Namen, Kontaktinformationen, Geburtsdatum etc.), verwendet werden, sondern  
521 nur ein Nummern- und/oder Buchstabencode. Dem jeweiligen Prüfbüro steht eine  
522 Pseudonymisierungsliste zur Verfügung, die dort gegen unbefugten Zugriff geschützt verbleibt.  
523 Das ist notwendig, damit Ihnen diese personenbezogenen Daten, falls erforderlich, wieder  
524 zugeordnet werden können (Entschlüsselung). Eine solche Entschlüsselung geschieht nur, wenn  
525 es im Rahmen der Studie zum Schutz Ihrer Gesundheit notwendig ist. In diesem Rahmen ist  
526 eine Entschlüsselung rechtlich zulässig. Es lässt sich allerdings niemals völlig ausschließen, dass  
527 auch ohne diese Liste zur Entschlüsselung Rückschlüsse auf Ihre Person gezogen werden  
528 könnten.

529 Die pseudonymisierten Daten werden insbesondere an den Sponsor dieser klinischen Prüfung  
530 weitergegeben und dort gespeichert (siehe II. 1. Buchst. e) Weitergabe/Empfänger).

531

#### 532 b) **Rechtsgrundlage**

533 Rechtsgrundlage für die Datenverarbeitung ist Ihre informierte Einwilligung gemäß Art. 6 Abs. 1  
534 Buchst. a und Art. 9 Abs. 2 Buchst. a der EU Datenschutzgrundverordnung (DSGVO) sowie § 40b  
535 Abs. 6 Arzneimittelgesetz (AMG) und Art. 9 Abs. 2 Buchstabe j DSGVO.

536 Die Bereitstellung Ihrer personenbezogenen Daten ist freiwillig. Ohne Ihre ausdrückliche  
537 Einwilligung in die Verarbeitung Ihrer Daten können Sie allerdings nicht an dieser klinischen  
538 Prüfung teilnehmen.

#### 539 c) **Verantwortlichkeit**

540 Verantwortlich im Sinne des Datenschutzrechts ist der Sponsor der klinischen Prüfung, Goethe-  
541 Universität Frankfurt, ebenso wie das Prüfbüro. Das Prüfbüro bleibt davon unabhängig  
542 für die Behandlungsdaten verantwortlich (unkodierte Patientendaten).

543 **d) Zweck(e)**

544 Mit Hilfe der erhobenen Daten soll die Unbedenklichkeit oder Wirksamkeit von IMU-838 bei  
545 Menschen, die am Post COVID Syndrom leiden, klinisch untersucht werden.

546 Zudem werden die erhobenen Daten auch bei den notwendigen Zulassungsverfahren für das zu  
547 untersuchende Arzneimittel verwendet.

548  
549 Wir möchten Ihnen die Möglichkeit geben, Ihre Daten und Bioproben für spätere medizinische  
550 Forschungsprojekte zur Verfügung zu stellen. Eine Entscheidung dafür oder dagegen ist  
551 freiwillig, jederzeit widerrufbar, und hat keine Auswirkung auf Ihre Teilnahme an dieser Studie.  
552 Bitte beachten Sie dazu die Patienteninformation „Optionale zusätzliche Sammlung von  
553 Bioproben und Nutzung von Daten im Rahmen der klinischen Arzneimittelprüfung: Randomized  
554 adaptive assessment of post COVID syndrome treatments\_Reducing Inflammatory Activity in  
555 Patients with post COVID Syndrome“.

556

557 **e) Weitergabe/Empfänger**

558 Die für die klinische Prüfung wichtigen Daten und Bioproben werden zusätzlich in  
559 pseudonymisierter Form verarbeitet und gegebenenfalls weitergegeben.

560 Die erhobenen Daten werden, soweit erforderlich, pseudonymisiert weitergegeben an:

561 1) den Sponsor, Goethe-Universität Frankfurt, und von diesem beauftragte Stellen zum Zweck  
562 der Durchführung und wissenschaftlichen Auswertung,

563

564 Institut für Digitale Medizin  
565 Universitätsklinikum Gießen und Marburg GmbH (UKGM), Philipps-Universität Marburg  
566 Baldingerstraße  
567 35042 Marburg

568

569 Klinikum rechts der Isar, Technische Universität München  
570 Innere Medizin I, Arbeitsgruppe Biosignalanalyse  
571 Ismaninger Str. 22  
572 81675 München

573

574 Universitätsklinikum Frankfurt, Institut für Medizinische Virologie  
575 Paul-Ehrlich-Straße 40, 60596 Frankfurt am Main

576

577 Charité-Universitätsmedizin Berlin,  
578 Berlin Institute of Health at Charité (BIH), Translationale Immunologie  
579 Campus Virchow-Klinikum

580 Augustenburger Platz 1  
 581 D-13353 Berlin  
 582  
 583 Unabhängige Treuhandstelle der Universitätsmedizin Greifswald K.d.ö.R.  
 584 Ellernholzstr. 1-2  
 585 17475 Greifswald  
 586  
 587 Hannover Unified Biobank (HUB)  
 588 Medizinische Hochschule Hannover (MHH)  
 589 Feodor-Lynen-Str.15  
 590 30625 Hannover  
 591  
 592 Zentrale Biobank der Universität Bielefeld  
 593 Medizinische Fakultät OWL  
 594 Universität Bielefeld  
 595 Universitätsstraße 25  
 596 33615 Bielefeld  
 597  
 598 Charité – Universitätsmedizin Berlin,  
 599 Institut für kardiovaskuläre Computer-assistierte Medizin (ICM)  
 600 Campus Virchow-Klinikum  
 601 Augustenburger Platz 1  
 602 13353 Berlin  
 603  
 604 Universitätsmedizin Greifswald  
 605 Institut für Klinische Chemie und Laboratoriumsmedizin  
 606 Ferdinand-Sauerbruch-Straße  
 607 17475 Greifswald  
 608  
 609 Medizinische Informatik Göttingen  
 610 Institut für Medizinische Informatik  
 611 Universitätsmedizin Göttingen der Georg-August-Universität  
 612 Robert-Koch-Str. 40, 37075 Göttingen  
 613  
 614 Studienzentrum Universitätsmedizin Göttingen der Georg-August-Universität  
 615 Von-Bar-Straße 2/4, 37075 Göttingen  
 616

617 2) im Falle unerwünschter Ereignisse: an den Sponsor,  
618 - sowie von diesem ggf. an die zuständigen Behörden der Mitgliedstaaten der Europäischen  
619 Union oder des Abkommens über den Europäischen Wirtschaftsraum, in deren Hoheitsgebiet  
620 die o.g. klinische Prüfung durchgeführt wird

621 - oder an die für die Arzneimittelsicherheit eingerichtete Europäische Datenbank  
622 (EudraVigilance), auf die die zuständigen Überwachungsbehörden in der gesamten  
623 Europäischen Union und dem Europäischen Wirtschaftsraum Zugriff haben,

624 3) im Fall eines Antrags auf Zulassung als Arzneimittel an den Antragsteller und die für die  
625 Zulassung zuständige Behörde.

626 Die von Ihnen im Rahmen der oben genannten klinischen Studie erhobenen und gespeicherten  
627 Daten (auch die originalen Klardaten) können soweit erforderlich und gesetzlich erlaubt, durch  
628 die zuständige Überwachungsbehörde im Rahmen von Inspektionen oder durch Beauftragte  
629 des Sponsors (s.g. Auditoren oder Monitore) zur Überprüfung der ordnungsgemäßen  
630 Durchführung der klinischen Prüfung im Prüfzentrum eingesehen werden. Diese Personen sind  
631 zur Vertraulichkeit verpflichtet, eine Weitergabe der erhobenen Daten erfolgt in diesem  
632 Zusammenhang nicht.

633 Für diese Studie hat die Immunic AG die Prüfsubstanz bereitgestellt. Für Forschungszwecke gibt  
634 es die Möglichkeit für die Immunic AG ihre Daten zu kaufen. Dabei findet eine Übermittlung  
635 ihrer Daten in verschlüsselter Form an die Immunic AG oder von ihr beauftragte Unternehmen  
636 in den USA statt. Die Übermittlung von Daten in die USA erfolgt gemäß einem  
637 Angemessenheitsbeschluss der EU-Kommission. Dieser Beschluss besagt, dass die USA ein  
638 angemessenes Schutzniveau bieten. Die entsprechenden Beschlüsse der Kommission sind im  
639 Amtsblatt der EU sowie auf der Website der Kommission veröffentlicht und können unter  
640 folgendem Link eingesehen werden:

641 [https://commission.europa.eu/document/fa09cbad-dd7d-4684-ae60-be03fcb0fddf\\_en](https://commission.europa.eu/document/fa09cbad-dd7d-4684-ae60-be03fcb0fddf_en)

642 Die Daten werden nur an solche beauftragten Dritten übermittelt, die sich freiwillig gemäß dem  
643 o.g. Beschluss in den USA registriert haben oder mit denen Standarddatenschutzklauseln der  
644 Kommission oder einer Aufsichtsbehörde gemäß Art. 46 Abs. 2 lit. c und d DSGVO vertraglich  
645 vereinbart sind.

646 Bitte beachten Sie, dass Ihre Armbanduhr/Smartwatch ausschließlich mit der SaniQ App  
647 verbunden werden sollte. Bei der Verbindung mit anderen Apps, wie etwa solchen des  
648 Herstellers der Uhr (z. B. Garmin Connect™) kann der Schutz Ihrer Daten nicht gewährleistet  
649 werden.

#### 650 **f) Ihre Rechte**

651 Sie haben grundsätzlich folgende Rechte bezüglich Ihrer personenbezogenen Daten, sofern dies  
652 nicht aufgrund einer zwischenzeitlich vorgenommenen Löschung der identifizierenden  
653 Merkmale zur Entschlüsselung technisch oder anderweitig gesetzlich unmöglich ist:

654 **Recht auf Widerruf Ihrer Einwilligung**

655 So wie die Einwilligung zur Teilnahme an der klinischen Prüfung können Sie auch Ihre  
656 Einwilligung zur Verarbeitung der erhobenen Daten jederzeit widerrufen. Gemäß § 40b Abs. 6  
657 Nr. 2 AMG dürfen im Falle eines Widerrufs Ihre gespeicherten Daten jedoch weiterverwendet  
658 werden, soweit dies erforderlich ist, um

- 659 1) die Wirkungen des zu prüfenden Arzneimittels festzustellen,  
660 2) sicherzustellen, dass Ihre schutzwürdigen Interessen nicht beeinträchtigt werden,  
661 3) der Pflicht zur Vorlage vollständiger Zulassungsunterlagen zu genügen.

662 Im Falle eines Widerrufs Ihrer Einwilligung werden die verantwortlichen Stellen unverzüglich  
663 prüfen, inwieweit die gespeicherten Daten noch erforderlich sind. Nicht mehr benötigte Daten  
664 werden unverzüglich gelöscht, sofern nicht gesetzliche Dokumentations- und Meldepflichten  
665 entgegenstehen. Die bis zum Widerruf erfolgte Datenverarbeitung bleibt jedoch rechtmäßig.

666 Bei Widerruf der Studienteilnahme werden Sie gefragt, ob Sie noch einmal zum eigentlichen  
667 Ende des Teilnahmezeitraumes angerufen werden dürfen, um Ihr aktuelles Befinden zu  
668 erfragen.

669 **Sie haben weiterhin folgende Rechte**

670 Recht auf Auskunft (inkl. unentgeltlicher Überlassung einer Kopie) über Ihre  
671 personenbezogenen Daten, die im Rahmen der klinischen Prüfung erhoben, verarbeitet oder  
672 ggf. an Dritte übermittelt werden.

673 Recht auf Datenübertragung der zu Ihrer Person erhobenen Daten an Sie oder eine bestimmte  
674 Stelle.

675 Recht auf Berichtigung unrichtiger personenbezogener Daten, auf Einschränkung der  
676 Verarbeitung und auf Widerspruch gegen die Nutzung der Daten.

677 **Mögliche Einschränkungen Ihrer Rechte**

678 Da die Daten im Rahmen einer klinischen Prüfung eines Arzneimittels gemäß den  
679 Bestimmungen des Arzneimittelgesetzes verwendet werden, können die oben genannten  
680 Rechte unter Umständen nach Prüfung des Einzelfalls eingeschränkt werden (insbesondere  
681 nach Art. 17 Abs. 3 Buchst. d und Art. 89 DSGVO). Dies gilt insbesondere, wenn der Anwendung  
682 eines dieser Rechte vertragliche, gesetzlichen und/oder behördlichen Dokumentations- und  
683 Meldepflichten entgegenstehen oder die Durchführung der Klinischen Prüfung hierdurch  
684 unmöglich gemacht oder ernsthaft beeinträchtigt würde.

685

686 **Wahrnehmung Ihrer Rechte**

687 Wollen Sie von einem oder mehreren der genannten Rechte Gebrauch machen, kontaktieren  
688 Sie bitte Ihren Prüfarzt. Bei Anliegen zur Datenverarbeitung und zur Einhaltung der

689 datenschutzrechtlichen Anforderungen können Sie sich auch an folgende  
690 Datenschutzbeauftragte wenden:

691 Datenschutzbeauftragter der Prü fzentrum:

692 **Datenschutzbeauftragter der Einrichtung:**

693 **XXX**

694 **Kontaktdaten des zuständigen Datenschutzbeauftragten**

695 **Bezeichnung, Postanschrift, Telefonnummer und E-Mailadresse**

696 Datenschutzbeauftragter des Sponsors:

697 Datenschutzbeauftragter der Goethe-Universität Frankfurt

698 Robert-Mayer-Straße 11-15

699 60325 Frankfurt am Main

700 Tel.: 069/798-28351

701 E-Mail: [dsb@uni-frankfurt.de](mailto:dsb@uni-frankfurt.de)

702 Sie haben grundsätzlich auch das Recht jederzeit den Sponsor selbst zu kontaktieren. Bitte  
703 wenden Sie sich jedoch im Regelfall an den Prüfer bzw. den Datenschutzbeauftragten in Ihrem  
704 Prü fzentrum, da aufgrund der Pseudonymisierung nur hier Ihre Identität bekannt ist und damit  
705 sinnvollerweise weitere Schritte unternommen werden können, bzw. eine unbeabsichtigte  
706 Identifikation Ihrer Person durch den Sponsor vermieden werden kann. Die Unabhängige  
707 Treuhandstelle steht Ihnen bezüglich Ihrer Betroffenenrechte auch nach Beendigung der Studie  
708 langfristig als Ansprechpartner zur Verfügung.

709 Sie haben außerdem ein Beschwerderecht bei einer Datenschutzaufsichtsbehörde. Sollten Sie  
710 Bedenken hinsichtlich des Umgangs mit Ihren personenbezogenen Daten haben, können Sie  
711 sich an folgende Stellen wenden:

712 Datenschutzaufsichtsbehörde des Bundeslandes, in dem Ihr Prü fzentrum **liegt [wird pro**  
713 **Zentrum angepasst]**

714 **Der Landesbeauftragte für den Datenschutz und die Informationsfreiheit Baden-Württemberg**

715 **Postfach 10 29 32**

716 **70025 Stuttgart**

717 **oder**

718 **Lautenschlagerstraße 20**

719 **70173 Stuttgart**

720 **Telefon: 07 11/61 55 41-0**

721 **E-Mail: [poststelle@lfdi.bwl.de](mailto:poststelle@lfdi.bwl.de)**

722

723 **Der Bayerische Landesbeauftragte für den Datenschutz**

724 **Postfach 22 12 19**

725 **80502 München**

726 **Telefon: 089/21 26 72-0**

727 **E-Mail: [poststelle@datenschutz-bayern.de](mailto:poststelle@datenschutz-bayern.de)**

728



- 729 Berliner Beauftragte für Datenschutz und Informationsfreiheit  
730 Alt-Moabit 59-61  
731 10555 Berlin  
732 Telefon: 030/138 89-0  
733 E-Mail: mailbox@datenschutz-berlin.de  
734
- 735 Der Hessische Beauftragte für Datenschutz und Informationsfreiheit  
736 Postfach 31 63  
737 65021 Wiesbaden  
738 Gustav-Stresemann-Ring 1  
739 65189 Wiesbaden  
740 Telefon: 06 11/140 80  
741 E-Mail: poststelle@datenschutz.hessen.de  
742
- 743 Der Landesbeauftragte für Datenschutz und Informationsfreiheit Mecklenburg-Vorpommern  
744 Schloss Schwerin  
745 Lennéstraße 1  
746 19053 Schwerin  
747 Telefon: 0385/59494-0  
748 E-Mail: info@datenschutz-mv.de  
749
- 750 Die Landesbeauftragte für den Datenschutz Niedersachsen  
751 Prinzenstraße 5  
752 30159 Hannover  
753 Telefon: 05 11/120-45 00  
754 E-Mail: poststelle@lfd.niedersachsen.de  
755
- 756 Landesbeauftragte für Datenschutz und Informationsfreiheit Nordrhein-Westfalen  
757 Postfach 20 04 44  
758 40102 Düsseldorf  
759 oder  
760 Kavalleriestraße 2-4  
761 40213 Düsseldorf  
762 Telefon: 02 11/384 24-0  
763 E-Mail: poststelle@ldi.nrw.de  
764
- 765 Sächsische Datenschutz- und Transparenzbeauftragte  
766 Postfach 11 01 32  
767 01330 Dresden  
768 oder  
769 Devrientstraße 5  
770 01067 Dresden  
771 Telefon: 03 51 / 85471-101  
772 E-Mail : saechsdsb@slt.sachsen.de  
773
- 774 Unabhängiges Landeszentrum für Datenschutz Schleswig-Holstein  
775 Postfach 71 16

776 24171 Kiel  
777 oder  
778 Holstenstraße 98  
779 24103 Kiel  
780 Telefon: 04 31/988-12 00  
781 E-Mail: mail@datenschutzzentrum.de

782 Für den Sponsor bzw. dessen Vertreter innerhalb der EU zuständige  
783 Datenschutzaufsichtsbehörde:

784 Der Hessische Beauftragte für Datenschutz und Informationsfreiheit  
785 Postfach 31 63  
786 65021 Wiesbaden  
787 Gustav-Stresemann-Ring 1  
788 65189 Wiesbaden  
789 Telefon: 06 11/140 80  
790 E-Mail: [poststelle@datenschutz.hessen.de](mailto:poststelle@datenschutz.hessen.de)

791 Eine Liste aller in Deutschland und der Europäischen Union zuständigen  
792 Datenschutzaufsichtsbehörden finden Sie unter:  
793 [https://www.bfdi.bund.de/DE/Infothek/Anschriften\\_Links/anschriften\\_links-node.html](https://www.bfdi.bund.de/DE/Infothek/Anschriften_Links/anschriften_links-node.html)

794 **g) Dauer der Speicherung der Daten:**

795 Die erhobenen Daten werden von dem Prüfzentrum und dem Sponsor nach Beendigung oder  
796 Abbruch der klinischen Prüfung für 25 Jahre gespeichert. Danach werden die  
797 personenbezogenen Daten gelöscht, sofern Sie nicht der weiteren Verwendung Ihrer Daten zu  
798 Forschungszwecken zugestimmt hatten.

799 **h) Veröffentlichung**

800 Wissenschaftliche Veröffentlichungen von Ergebnissen dieser klinischen Prüfung erfolgen in  
801 einer Form, die keine direkten Rückschlüsse auf Ihre Person zulässt.

802 **II. 2. Was geschieht mit meinen Bioproben?**

803 Während dieser klinischen Prüfung werden Ihnen Bioproben (Blut, Stuhlproben) entnommen;  
804 die Proben werden ebenso wie die Daten in pseudonymisierter Form aufbewahrt (siehe zur  
805 Pseudonymisierung oben II. 1. Buchst. a)).

806 Die Pseudonymisierung Ihrer Bioproben bietet allerdings nicht zwangsläufig den gleichen  
807 Schutz wie die Pseudonymisierung der erhobenen Daten, da Bioproben immer Informationen  
808 zu Ihrer Erbsubstanz beinhalten, die eine Identifizierung ermöglichen könnte.

809 Da somit aus Ihren Bioproben Informationen gewonnen werden können, gelten die oben unter  
810 II. 1. genannten datenschutzrechtlichen Aspekte entsprechend auch für Ihre Bioproben.

811 **a) Verwendung Ihrer Bioproben**

812 Mit Hilfe der Bioproben soll die Unbedenklichkeit oder Wirksamkeit von IMU-838 bei Menschen  
813 mit Post COVID Syndrom klinisch untersucht werden.

814 Zudem können die Bioproben auch bei den notwendigen Zulassungsverfahren für das zu  
815 untersuchende Arzneimittel verwendet werden.

816 Sie werden zu weiteren optionalen Verwendungszwecken gesondert angesprochen,  
817 entsprechend aufgeklärt und um eine separate Einwilligung gebeten.

818 Ihre Proben werden Eigentum von der Goethe-Universität Frankfurt. Dessen ungeachtet  
819 bleiben Ihre Rechte, die Ihre Persönlichkeit im Zusammenhang mit dem Körpermaterial  
820 schützen, davon unberührt.

821 **b) Lagerung**

822 Die Aufbewahrung der Bioproben erfolgt unter Verantwortung des lokalen Studienleiters. Sie  
823 werden nach Ende der Studie vernichtet, soweit keine gesetzliche Aufbewahrungspflicht  
824 besteht oder Sie gesondert ihre Einwilligung zur weiteren Nutzung für spätere medizinische  
825 Forschungsprojekte erteilen.

826 Die Bioproben werden unter Verantwortung des Sponsors ausschließlich innerhalb der  
827 Europäischen Union gelagert.

828 **c) Weitergabe/Empfänger**

829 Die Bioproben werden im Auftrag des Sponsors an Analyselabore weitergegeben. Es gelten  
830 entsprechend die Ausführungen oben II. 1. e), insbesondere auch zur Weitergabe in andere  
831 Länder.

832 **d) Umgang mit den Bioproben bei Widerruf/vorzeitiger Beendigung der Teilnahme**

833 Wenn Sie Ihre Teilnahme an der klinischen Prüfung vorzeitig beenden möchten, werden Ihre  
834 Proben vernichtet, außer, diese müssen weiterhin für die Studie vorgehalten werden. Es gelten  
835 entsprechend die Ausführungen oben II. 1. f).

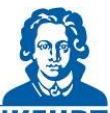

836 **Einwilligungserklärung zu einer klinischen Prüfung (Studie) mit optionalem MRT**

837 **Prüfzentrum:**

838 xy

839 **Hauptprüfer oder einziger Prüfer:** XXX

840 EU trial number: 2024-511628-16-00

841 Name und Anschrift des Sponsors: Goethe-Universität Frankfurt, vertreten durch den  
842 Präsidenten, dieser vertreten durch

843 Universitätsklinikum Frankfurt

844 Theodor-Stern-Kai 7

845 60590 Frankfurt

846 Tel.:

847 E-Mail:

848

849 **Randomisierte Studie zur Untersuchung von Behandlungsoptionen des Post-**  
850 **COVID Syndroms**

851 Randomized adaptive assessment of post COVID syndrome treatments\_Reducing Inflammatory  
852 Activity in Patients with post COVID Syndrome

853 Prüfplancode: RAPID\_REVIVE

854

855

856

Die grauen Felder sind von dem/der Ärzt\*in auszufüllen

|                                                                         |
|-------------------------------------------------------------------------|
| <b>pheno</b> _ _ _ _ _ _ _ _ _ _<br>Codierung erfolgt nach Unterschrift |
|-------------------------------------------------------------------------|

857

|                                  |                                                                                  |               |
|----------------------------------|----------------------------------------------------------------------------------|---------------|
| Name, Vorname des/der Patient*in | <input type="checkbox"/> m <input type="checkbox"/> w <input type="checkbox"/> d | Geburtsdatum: |
|                                  |                                                                                  |               |
|                                  |                                                                                  | Geburtsort:   |
|                                  |                                                                                  |               |

858

859

860

861 Ich bin in einem persönlichen Gespräch durch den Prüfarzt ausführlich und verständlich über  
862 Wesen, Bedeutung, Risiken und Tragweite der klinischen Prüfung aufgeklärt worden. Ich habe  
863 darüber hinaus den Text der Patienteninformation mit seinen beiden Teilen (Teil I:  
864 Informationen zu gesundheitlichen Aspekten; Teil II: Informationen zur Verwendung der Daten  
865 und Bioproben) gelesen und verstanden. Ich hatte die Gelegenheit, mit dem Prüfarzt über die  
866 Durchführung der klinischen Prüfung zu sprechen. Alle meine Fragen wurden zufriedenstellend  
867 beantwortet.

868 Ich hatte ausreichend Zeit, mich zu entscheiden.

869 Mir ist bekannt, dass ich jederzeit und ohne Angabe von Gründen meine Einwilligung zur  
870 Teilnahme an der klinischen Prüfung zurückziehen kann (mündlich oder schriftlich), ohne dass  
871 mir daraus Nachteile entstehen.

872  
873  
874  
875  
876  
877  
878  
879  
880  
881  
882  
883  
884  
885  
886  
887  
888  
889  
890  
891  
892  
893  
894  
895  
896  
897  
898  
899  
900  
901  
902

**Ergänzungen durch die aufklärende Person:**

**Folgende wesentliche Gesichtspunkte oder Fragen sind in dem mündlichen Aufklärungsgespräch genauer besprochen worden. Ich habe mich dabei davon überzeugt, dass der Patient alle für ihn wichtigen Fragen stellen konnte und die Aufklärung für ihn verständlich war.**

903    **Datenschutzrechtliche Einwilligung**

904    I. Mir ist bekannt, dass bei dieser klinischen Prüfung **personenbezogene Daten**, insbesondere  
905    medizinische Befunde über mich erhoben, gespeichert und ausgewertet werden sollen. Die  
906    Verwendung meiner personenbezogenen Daten setzt vor der Teilnahme an der klinischen  
907    Prüfung folgende freiwillig abgegebene Einwilligungserklärung voraus; ohne die nachfolgende  
908    Einwilligung kann ich nicht an der klinischen Prüfung teilnehmen.

909    - Ich willige ein, dass im Rahmen dieser klinischen Prüfung personenbezogene Daten,  
910    insbesondere Angaben über meine Gesundheit und meine ethnische Herkunft, über mich  
911    erhoben und in Papierform sowie auf elektronischen Datenträgern gemäß den Angaben in der  
912    Informationsschrift Teil II 1. aufgezeichnet, verwendet und weitergegeben werden. Die dort  
913    genannten gesetzlichen Einschränkungen meiner Rechte sind mir bewusst.

914    II. Ich willige ein, dass meine **Bioproben** gemäß den Angaben der Informationsschrift Teil II 2.  
915    beschrieben aufbewahrt, verwendet und weitergegeben werden.

916    Das Eigentum an den Bioproben übertrage ich an den Sponsor

917

918    III. Bildgebungsverfahren des Kopfes mittels MRT

919    Ich wurde über die Risiken des Verfahrens und die Möglichkeit informiert, dass Zufallsbefunde  
920    bei der MRT Untersuchung erhoben werden können (gemäß den Angaben der  
921    Patienteninformation Teil I.5.b).

922    – Ich willige in die Teilnahme an dem Bildgebungsverfahren des Kopfes mittels MRT ein. Ich  
923    willige ein, dass im Fall eines Zufallsbefundes, dieser mit Fachärzten besprochen wird. Ich  
924    willige weiterhin ein, dass ich von [der/dem Name der behandelnden Einrichtung] wieder  
925    kontaktiert werden darf, um über medizinische Zufallsbefunde informiert zu werden. Mir ist  
926    bewusst, dass ein MRT des Kopfes nur durchgeführt werden kann, wenn ich in dieses Vorgehen  
927    eingewilligt habe.

928    ☐ Ja   ☐ Nein

929

930



- 931 **Ich willige freiwillig ein, an der oben genannten klinischen Prüfung teilzunehmen.**
- 932 **Zugleich willige ich in die Verarbeitung meiner personenbezogenen Daten und Bioproben wie**
- 933 **beschrieben und von mir angegeben ein.**
- 934 Ein Exemplar der Patienten-Information und -Einwilligung sowie die Versicherungsunterlagen
- 935 habe ich erhalten. Ein Exemplar verbleibt im Prüfbüro.
- 936 Die mir ausgehändigten Anlagen 1-3 gehören ebenso zu den Informationsunterlagen.
- 937
- 938 \_\_\_\_\_
- 939 Name, Vorname des Patienten in Druckbuchstaben
- 940
- 941 \_\_\_\_\_
- 942 Ort, Datum                      Unterschrift des **Patienten**
- 943
- 944 Ich habe das Aufklärungsgespräch geführt und die Einwilligung des Patienten eingeholt.
- 945
- 946 \_\_\_\_\_
- 947 Name, Vorname des aufklärenden Arztes des Prüfbüros in Druckbuchstaben
- 948
- 949 \_\_\_\_\_
- 950 Ort, Datum                      Unterschrift des aufklärenden **Arztes des Prüfbüros**
- 951

- 952 Anlagen
- 953 Anlage 1: Terminplan
- 954 Anlage 2: Gebrauchsanweisung Ohrsensor
- 955 Anlage 2: Gebrauchsanweisung Armbanduhr
- 956 Anlage 3: Nebenwirkungen
